# Supplementary material for: Synchrotron- and focal plane array-based Fourier-transform infrared spectroscopy differentiates the basalis and functionalis epithelial endometrial regions and identifies putative stem cell regions of human endometrial glands
Source: PubMed Central journal article supplement (PMC6021468; doi:10.1007/s00216-018-1111-x), 2018-05-09
Supplement: 216_2018_1111_MOESM1_ESM.pdf [file 216_2018_1111_MOESM1_ESM.pdf]

# **Analytical and Bioanalytical Chemistry**

## **Electronic Supplementary Material**

**Synchrotron- and focal plane array-based Fourier-transform infrared spectroscopy differentiates the basalis and functionalis epithelial endometrial regions and identifies putative stem cell regions of human endometrial glands**

Georgios Theophilou, Camilo L. M. Morais, Diane E. Halliwell, Kássio M. G. Lima,  
Josephine Drury, Pierre L. Martin-Hirsch, Helen F. Stringfellow, Dharani K. Hapangama,  
Francis L. Martin

**Table S1** Number of averaged spectra arranged by area as selected on slides for FPA analysis

| <i>Basalis</i>    |                            | <i>Functionalis</i> |                            |
|-------------------|----------------------------|---------------------|----------------------------|
| Sampled area code | Number of averaged spectra | Sampled area code   | Number of averaged spectra |
| 1                 | 2140                       | 1                   | 5127                       |
| 2                 | 510                        | 2                   | 945                        |
| 3                 | 1324                       | 3                   | 1534                       |
| 4                 | 2278                       | 4                   | 1589                       |
| 5                 | 3448                       | 5                   | 1534                       |
| 6                 | 4647                       | 6                   | 2064                       |
| 7                 | 1823                       | 7                   | 1299                       |
| 8                 | 1753                       | 8                   | 1100                       |
| 9                 | 1398                       | 9                   | 2060                       |
| 10                | 1450                       | 10                  | 3876                       |
| 11                | 1563                       | 11                  | 2155                       |
| 12                | 803                        | 12                  | 1517                       |
| 13                | 1906                       | 13                  | 3230                       |
| 14                | 592                        | 14                  | 2525                       |
| 15                | 1894                       | 15                  | 13211                      |
| 16                | 803                        | 16                  | 10123                      |
| 17                | 8195                       | 17                  | 7143                       |
| 18                | 1830                       | 18                  | 4800                       |
| TOTAL             | 38357                      | TOTAL               | 65832                      |

**Table S2** Selected variables by each chemometric technique employed for the differentiation of *basalis* from *functionalis* epithelial regions using FPA spectral data

|         | Selected variables as wavenumbers (cm <sup>-1</sup> )                           |
|---------|---------------------------------------------------------------------------------|
| SPA-LDA | 1236, 1506, 1519, 1552, 1566, 1616, 1627, 1654, 1666, 1672, 1687, 1693          |
| GA-LDA  | 923, 929, 950, 1014, 1029, 1033, 1072, 1097, 1411, 1510, 1602, 1662, 1666, 1746 |

**Table S3** Overall classification rates by each chemometric technique employed to differentiate *basalis* from *functionalis* epithelial regions using FPA spectral data

|                                             | PCA-LDA | SPA-LDA | GA-LDA |
|---------------------------------------------|---------|---------|--------|
| Classification rate for calibration set (%) | 66.7    | 87.5    | 95.8   |
| Classification rate for validation set (%)  | 50.0    | 100.0   | 100.0  |
| Classification rate for prediction set (%)  | 33.3    | 100.0   | 100.0  |

**Table S4** Overall classification rates by each chemometric technique employed to differentiate of *basalis* from *functionalis* tissues for individual specimen sets using FPA spectral data

|                                             | PCA-LDA | SPA-LDA | GA-LDA |
|---------------------------------------------|---------|---------|--------|
| <b>SPCN 1</b>                               |         |         |        |
| Classification rate for calibration set (%) | 100.0   | 100.0   | 100.0  |
| Classification rate for validation set (%)  | 66.7    | 100.0   | 100.0  |
| Classification rate for prediction set (%)  | 100.0   | 75.0    | 50.0   |
| <b>SPCN 2</b>                               |         |         |        |
| Classification rate for calibration set (%) | 100.0   | 100.0   | 100.0  |
| Classification rate for validation set (%)  | 0.0     | 100.0   | 100.0  |
| Classification rate for prediction set (%)  | 100.0   | 100.0   | 100.0  |
| <b>SPCN 3</b>                               |         |         |        |
| Classification rate for calibration set (%) | 93.3    | 100.0   | 93.3   |
| Classification rate for validation set (%)  | 100.0   | 100.0   | 100.0  |
| Classification rate for prediction set (%)  | 100.0   | 66.7    | 66.7   |

**Table S5** Selected variables by each chemometric technique employed to differentiate *basalis* from *functionalis* epithelial regions for individual specimen sets using FPA spectral data

| Selected variables as wavenumbers (cm <sup>-1</sup> ) |                                                                              |
|-------------------------------------------------------|------------------------------------------------------------------------------|
| <b>SPCN 1</b>                                         |                                                                              |
| SPA-LDA                                               | 1496, 1554, 1567, 1602, 1618, 1627, 1662, 1681, 1685, 1691, 1695             |
| GA-LDA                                                | 991, 1083, 1134, 1243, 1326, 1429, 1458, 1554, 1604, 1616, 1629, 1714        |
| <b>SPCN 2</b>                                         |                                                                              |
| SPA-LDA                                               | 975, 1238, 1633, 1683                                                        |
| GA-LDA                                                | 973, 1251, 1616, 1620, 1658                                                  |
| <b>SPCN 3</b>                                         |                                                                              |
| SPA-LDA                                               | 1083, 1220, 1236, 1510, 1548, 1556, 1610, 1623, 1625, 1631, 1660, 1687, 1693 |
| GA-LDA                                                | 933, 1139, 1297, 1299, 1747                                                  |

**Table S6** Overall classification rates for each chemometric technique employed to identify inter-individual variation between specimens within *basalis* epithelial layer

|                                             | PCA-LDA | SPA-LDA | GA-LDA |
|---------------------------------------------|---------|---------|--------|
| Classification rate for calibration set (%) | 93.3    | 100.0   | 100.0  |
| Classification rate for validation set (%)  | 75.0    | 100.0   | 100.0  |
| Classification rate for prediction set (%)  | 100.0   | 100.0   | 75.0   |

**Table S7** Selected variables used for each chemometric technique employed to identify inter-individual variability within the *basalis* layer using FPA spectral data

|         | Selected variables as wavenumbers (cm <sup>-1</sup> )                  |
|---------|------------------------------------------------------------------------|
| SPA-LDA | 1236, 1548, 1564, 1585, 1602, 1614, 1633, 1648, 1666, 1683, 1689, 1743 |
| GA-LDA  | 900, 983, 991, 1016, 1091, 1122, 1137, 1182, 1203, 1681, 1753          |

**Table S8** Selected variables used for each chemometric technique employed to differentiate Class 1 and Class 3 regions at the epithelial crypt bases using synchrotron data

|         | Selected variables as wavenumbers (cm <sup>-1</sup> ) |
|---------|-------------------------------------------------------|
| SPA-LDA | 1265, 1647                                            |
| GA-LDA  | 981, 1045, 1064, 1105, 1107, 1153, 1556, 1689         |

**Table S9** Overall classification rates by each chemometric technique employed to differentiate Class 1 and Class 3 regions at the epithelial crypt bases using synchrotron data

|                                             | PCA-LDA | SPA-LDA | GA-LDA |
|---------------------------------------------|---------|---------|--------|
| Classification rate for calibration set (%) | 74.6    | 58.7    | 96.8   |
| Classification rate for validation set (%)  | 69.2    | 69.2    | 100.0  |
| Classification rate for prediction set (%)  | 78.6    | 50.0    | 92.9   |

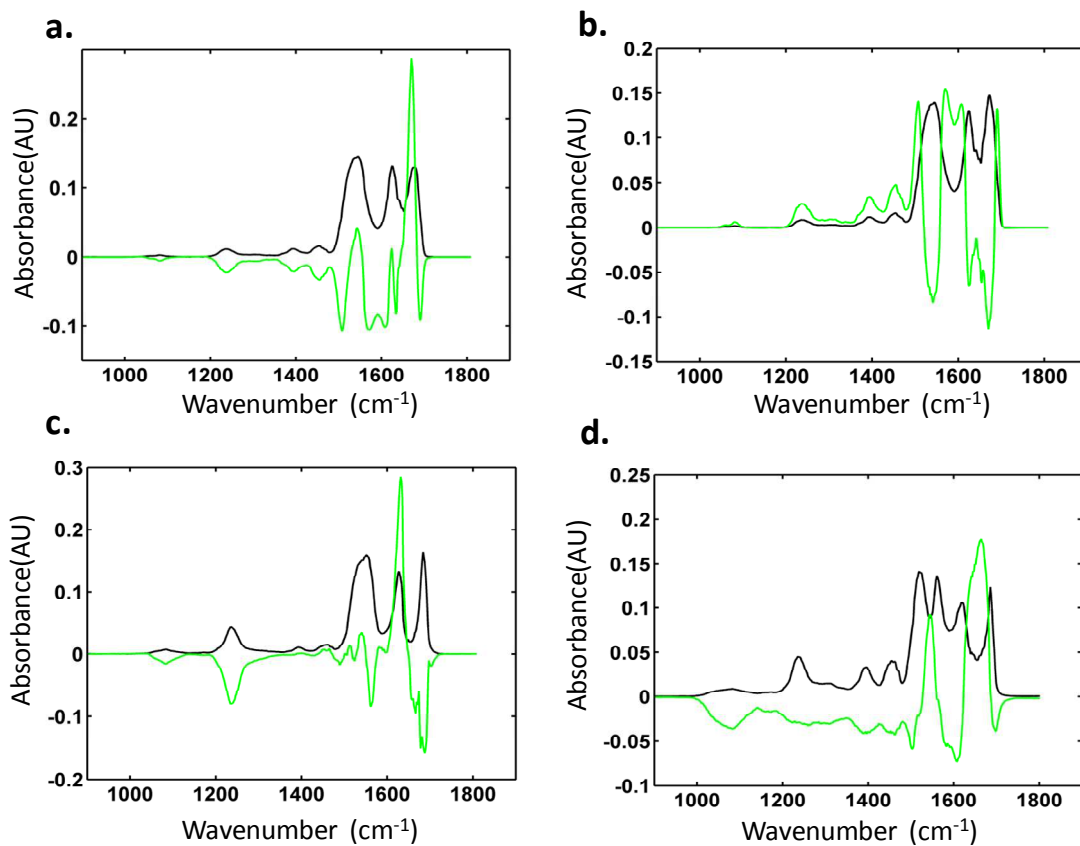

**Fig. S1** Loadings curves derived from PCA-LDA for the comparison of *basalis* and *functionalis* epithelial regions using FPA spectroscopy; (Black line: Loadings on PC1; green line: Loadings on PC). a. Loadings curve for *basalis* and *functionalis* comparison for all specimens, b. Loadings curve for *basalis* and *functionalis* comparison for SPCN 1, c. Loadings curve for *basalis* and *functionalis* comparison for SPCN 2, d. Loadings curve for *basalis* and *functionalis* comparison for SPCN 3

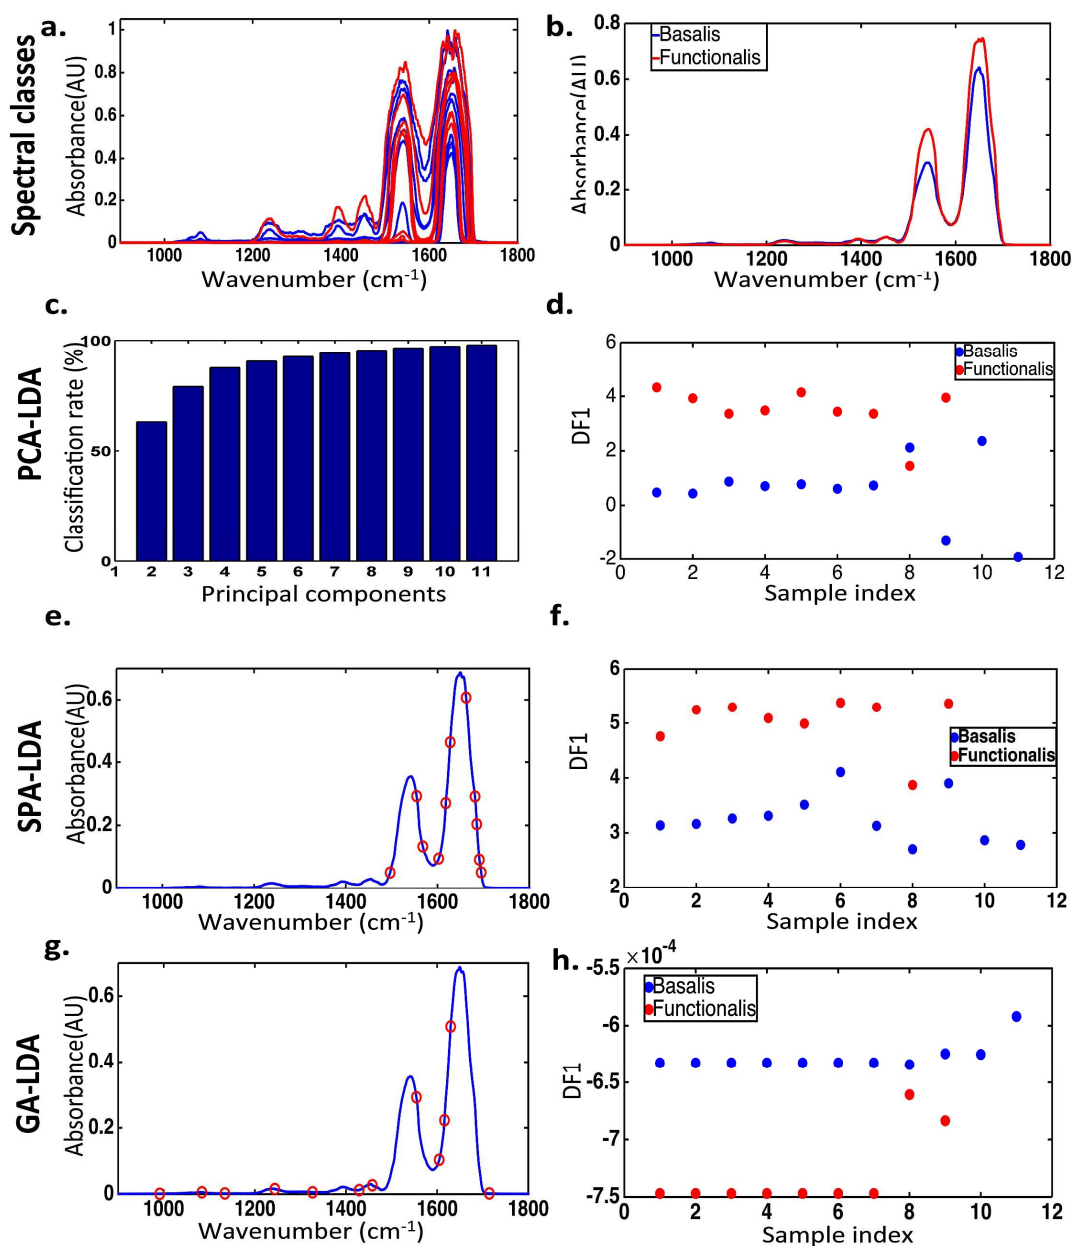

**Fig. S2** Classification of *Basalis* and *Functionalis* regions by spectral analysis using PCA-LDA, SPA-LDA and GA-LDA on FPA-FTIR derived data. (red= *Functionalis*, blue= *Basalis*): SPCN 1. a. Pre-processed spectra containing the biological fingerprint spectral regions, b. Averaged spectra for the *basalis* and *functionalis* regions, c. Cost/ function plot identifying the optimal number of PCs to be used for PCA, d. Scores plot graphically representing classification by PCA-LDA. The *x*-axis represents the sample index and the *y*-axis DF1, e. Wavenumber selection for SPA-LDA, f. Scores plot graphically representing classification by SPA-LDA. The *x*-axis represents the sample index and the *y*-axis DF1, g.

Wavenumber selection for GA-LDA, h. Scores plot graphically representing classification by GA-LDA. The  $x$ -axis represents sample index and the  $y$ -axis DF1

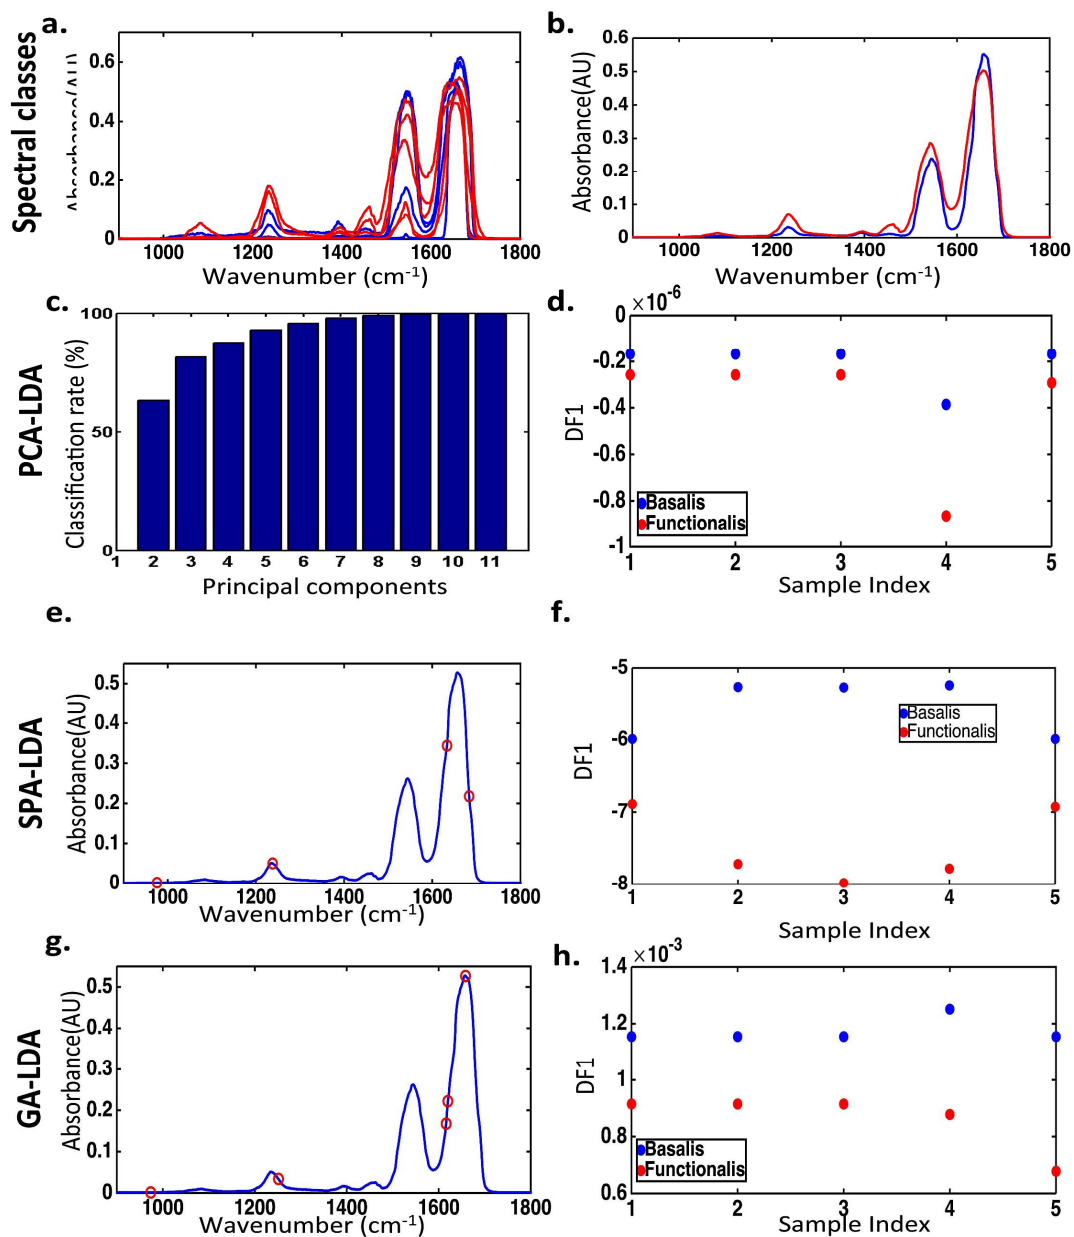

**Fig. S3** Classification of *Basalis* and *Functionalis* regions by spectral analysis using PCA-LDA, SPA-LDA and GA-LDA on FPA-FTIR derived data. (red= *Functionalis*, blue= *Basalis*): SPCN2. a. Pre-processed spectra containing the biological fingerprint spectral regions, b. Averaged spectra for the *basalis* and *functionalis* regions, c. Cost/ function plot identifying the optimal number of PCs to be used for PCA, d. Scores plot graphically representing classification by PCA-LDA. The  $x$ -axis represents the sample index and the  $y$ -axis DF1, e. Wavenumber selection for SPA-LDA, f. Scores plot graphically representing classification by SPA-LDA. The  $x$ -axis represents the sample index and the  $y$ -axis DF1, g. Wavenumber selection for GA-LDA, h. Scores plot graphically representing classification by GA-LDA. The  $x$ -axis represents sample index and the  $y$ -axis DF1



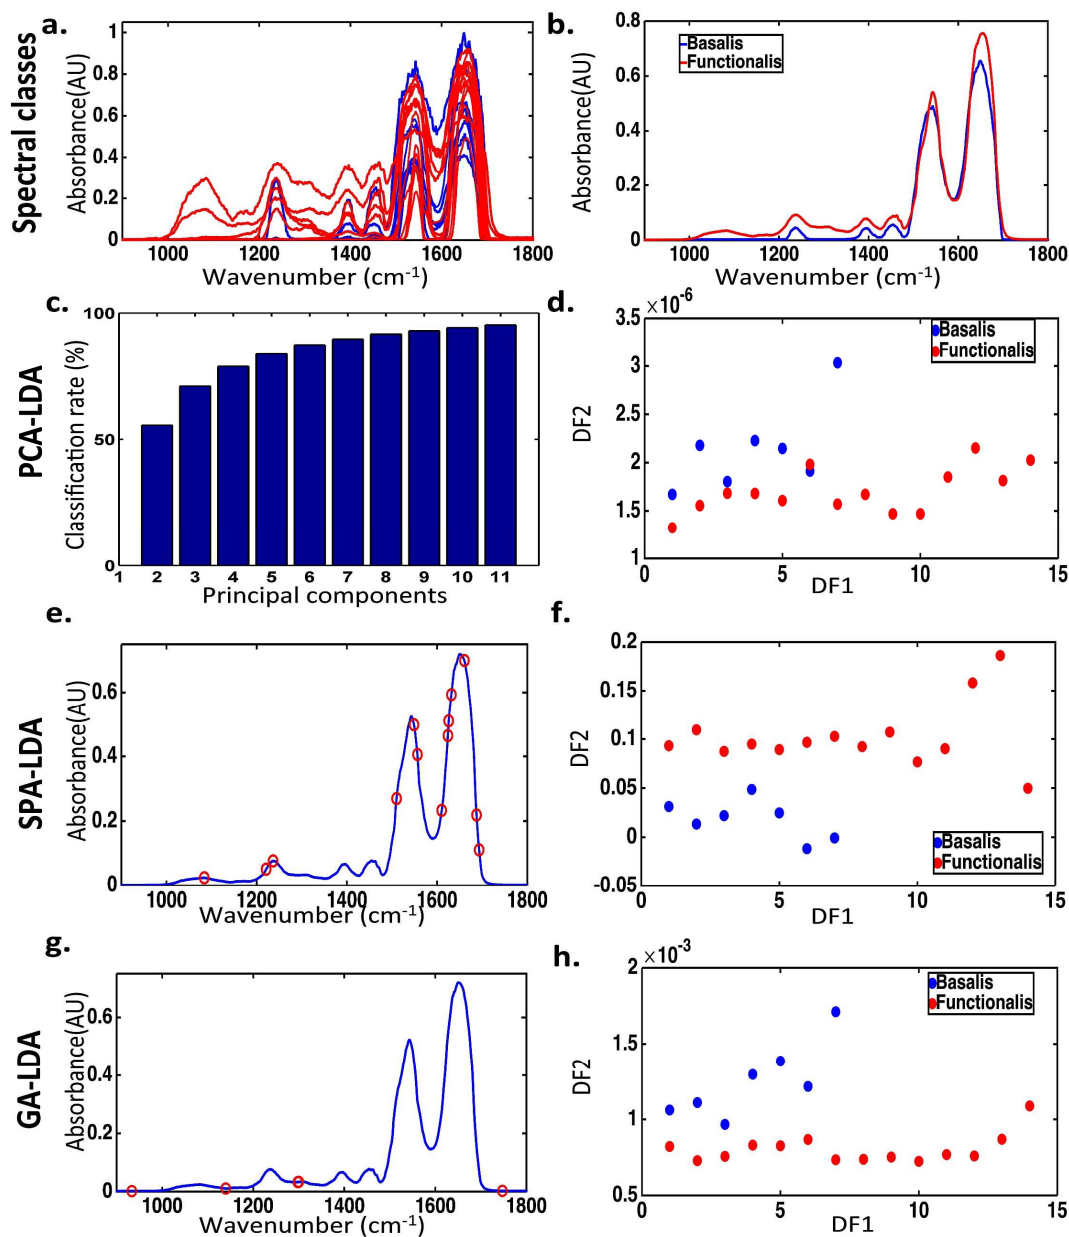

**Fig. S4** Classification of *Basalis* and *Functionalis* regions by spectral analysis using PCA-LDA, SPA-LDA and GA-LDA on FPA-FTIR derived data. (red= *Functionalis*, blue= *Basalis*): SPCN 3. a. Pre-processed spectra containing the biological fingerprint spectral regions, b. Averaged spectra for the *basalis* and *functionalis* regions, c. Cost/ function plot identifying the optimal number of PCs to be used for PCA, d. Scores plot graphically representing classification by PCA-LDA. The *x*-axis represents the sample index and the *y*-axis DF1, e. Wavenumber selection for SPA-LDA, f. Scores plot graphically representing classification by SPA-LDA. The *x*-axis represents the sample index and the *y*-axis DF1, g. Wavenumber selection for GA-LDA, h. Scores plot graphically representing classification by GA-LDA. The *x*-axis represents sample index and the *y*-axis DF1

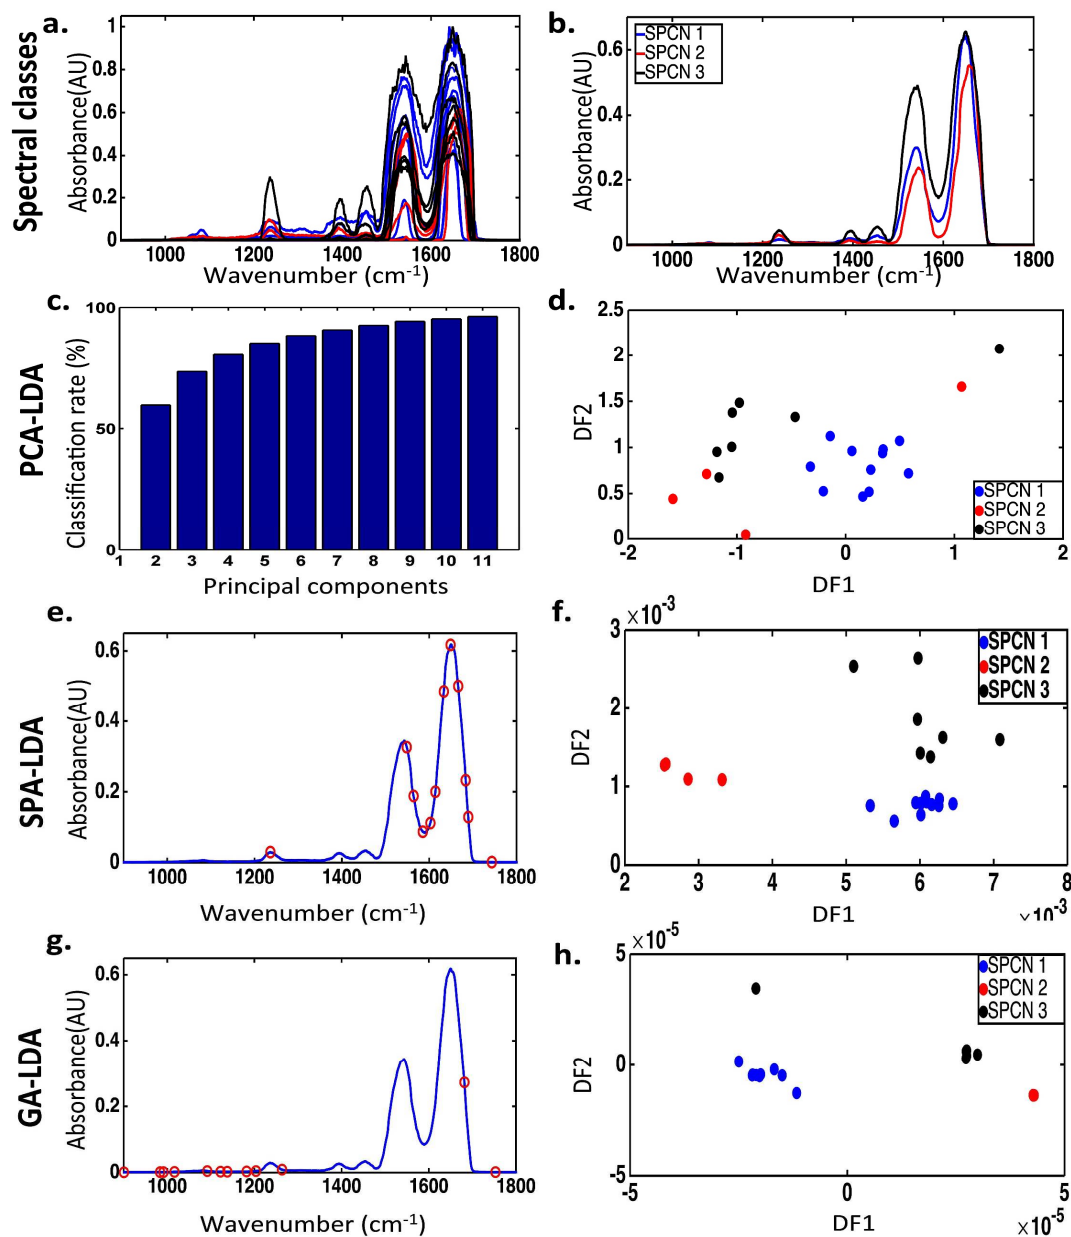

**Fig. S5** Classification specimens based on variability of their *Basalis* regions by spectral analysis using PCA-LDA, SPA-LDA and GA-LDA on FPA-FTIR derived data. (blue= SPCN1, red= SPCN2, black, SPCN3). a. Pre-processed spectra containing the biological fingerprint spectral regions, b. Averaged spectra for the *basalis* regions of the three specimens, c. Cost/ function plot identifying the optimal number of PCs to be used for PCA, d. Scores plot graphically representing classification by PCA-LDA. The *x*-axis represents DF1 and the *y*-axis DF2, e. Wavenumber selection for SPA-LDA, f. Scores plot graphically representing classification by SPA-LDA. The *x*-axis represents DF1 and the *y*-axis DF2, g. Wavenumber selection for GA-LDA, h. Scores plot graphically representing classification by GA-LDA. The *x*-axis represents DF1 and the *y*-axis DF2
